# Supplementary material for: Haem-iron plays a key role in the regulation of the Ess/type VII secretion system of Staphylococcus aureus RN6390
Source: PubMed Central journal article supplement (PMC5845736; doi:10.1099/mic.0.000579), 2017-11-24
Supplement: mic-163-1839-s001.pdf [file mic-163-1839-s001.pdf]

**Heme-iron plays a key role in the regulation of the  
Ess/Type VII secretion system of *Staphylococcus aureus***

**RN6390**

**SUPPLEMENTARY INFORMATION**

M. Guillermina Casabona<sup>1</sup>‡, Holger Kneuper<sup>1</sup>‡, Daniela Alferes de Lima<sup>1</sup> Catriona P. Harkins<sup>2</sup>,  
Martin Zoltner<sup>1</sup>, Erik Hjerde<sup>3</sup>, Matthew T.G. Holden<sup>2</sup> and Tracy Palmer<sup>1</sup>\*

<sup>1</sup>Division of Molecular Microbiology School of Life Sciences, University of Dundee, Dundee,  
UK.

<sup>2</sup>School of Medicine, University of St Andrews, St Andrews, KY16 9TF, UK.

<sup>3</sup>Department of Chemistry, Arctic University of Norway, Tromsø, Norway

‡ Contributed equally to this work. Listed alphabetically.

\*To whom correspondence should be addressed.

Tel +44 1382 386464

e-mail [t.palmer@dundee.ac.uk](mailto:t.palmer@dundee.ac.uk)

**Heme acquisition:**

*isdA* (5.4 fold), *isdB* (2.1\*), *isdC* (5.5 fold), *isdD* (6.2 fold), *isdE* (5.6 fold), *isdF* (6.1 fold), *isdG* (4.7 fold), *isdH* (1.8\*), *isdI* (5.7 fold), *srtB* (6.2 fold), SAOUHSC\_00131 (6.1 fold), SAOUHSC\_01087 (6.3 fold).

**Staphyloferrin A biosynthesis and uptake:**

*sfaA* (6.7 fold), *sfaB* (4.6 fold), *sfaC* (4.1 fold), *sfaD* (1.8 fold), *htsA* (10.5 fold), *htsB* (5.4 fold), *htsC* (1.7 fold).

**Staphyloferrin B biosynthesis and uptake:**

*sbnA* (1.9 fold), *sbnB* (1.9 fold), *sbnC* (3.5 fold), *sbnD* (1.7 fold), *sbnE* (1.6 fold), *sbnF* (1.5 fold), *sbnG* (1.4 fold), *sbnH* (2.5), *sbnI* (2.3\*), *sirA* (16.3 fold), *sirB* (7.4 fold), *sirC* (4.6 fold).

**Ferrichrome import**

*fhuA* (7.0 fold), *fhuB* (4.5 fold), *fhuG* (1.6 fold), *fhuD1* (8.0 fold), *fhuD2* (6.8 fold), *sstA* (10.9 fold), *sstB* (9.0 fold), *sstC* (9.1 fold) *sstD* (3.2 fold), SAOUHSC\_02245 (6.5 fold).

**Table S1.** Genes involved in iron acquisition and level of upregulation in the *essC* mutant relative to wild type. \*genes for which p value > 0.05 but were included for completeness.

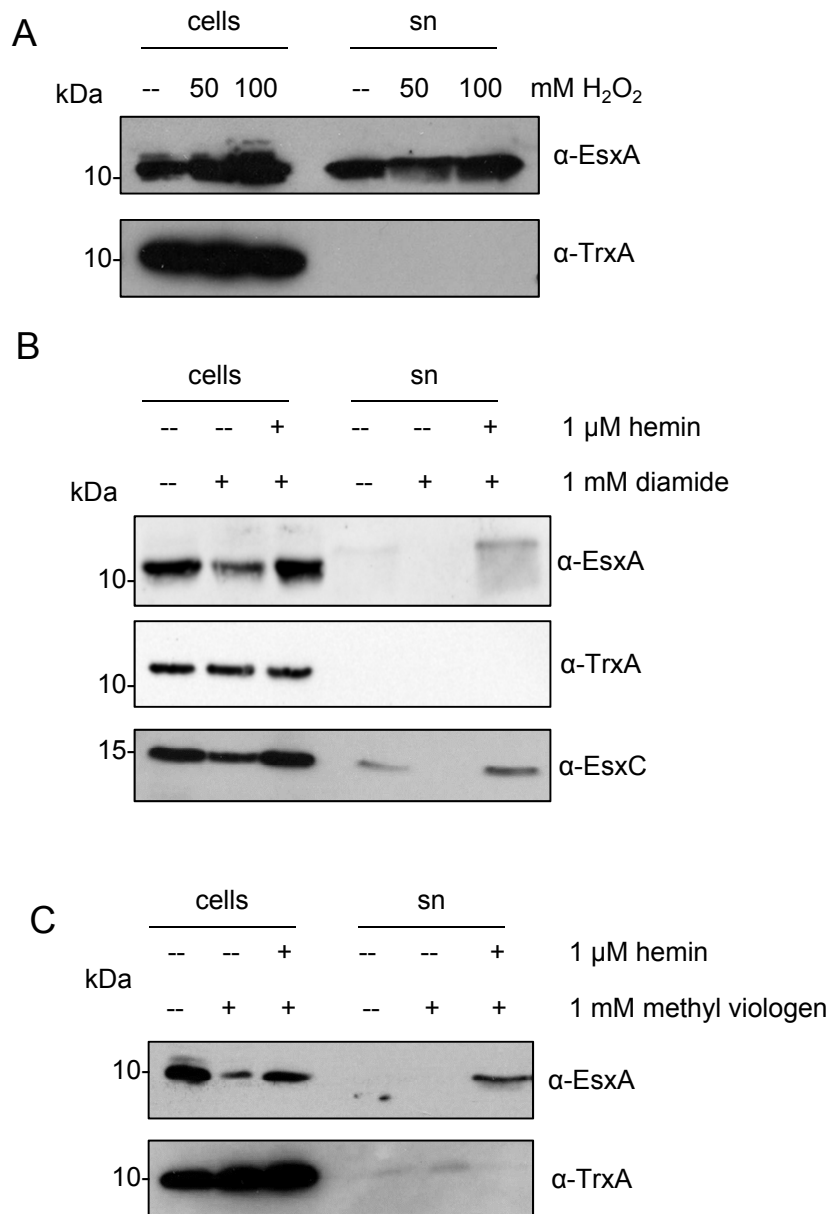

**Figure S1. Effect of oxidative stress on EsxA secretion.** *S. aureus* RN6390 was grown in the presence of the indicated concentrations of (A) H<sub>2</sub>O<sub>2</sub>, (B) diamide, or (C) methylviologen with or without the additional inclusion of hemin, and the secretion of EsxA was assessed by western blotting. For each gel, 5 μl of OD<sub>600</sub> 1 adjusted cells and an equivalent of 15 μl of culture supernatant (sn) were loaded. Western blots were probed with anti-EsxA, anti-EsxC or anti-TrxA (cytoplasmic control) antisera.

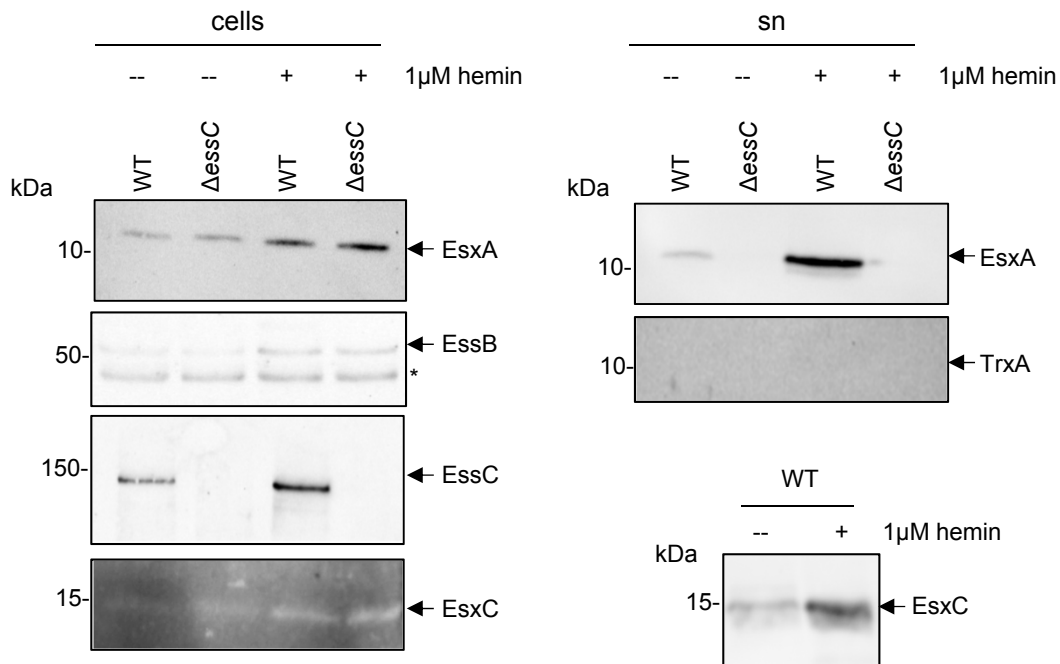

**Figure S2. Levels of T7 components and substrates in the presence or absence of hemin.** RN6390 and the isogenic  $\Delta$ essC mutant were grown aerobically in TSB medium in the presence or absence of 1  $\mu$ M hemin until  $OD_{600}$  of 2 was reached, after which samples were separated to give cells and supernatant. Representative western blots of EsxA and EsxC in cells and in TCA-precipitated supernatants (sn), and of EssB and EssC in cells are shown. The TCA-precipitated supernatants were also probed with anti-TrxA antisera to detect any cytoplasmic leakage. For quantification of protein in the cellular fraction 5  $\mu$ l of  $OD_{600}$  1 adjusted cells was loaded and for the TCA-precipitated supernatant an equivalent of 15  $\mu$ l of culture supernatant was loaded. \* indicates an unspecific band detected by the anti-EssB antiserum.

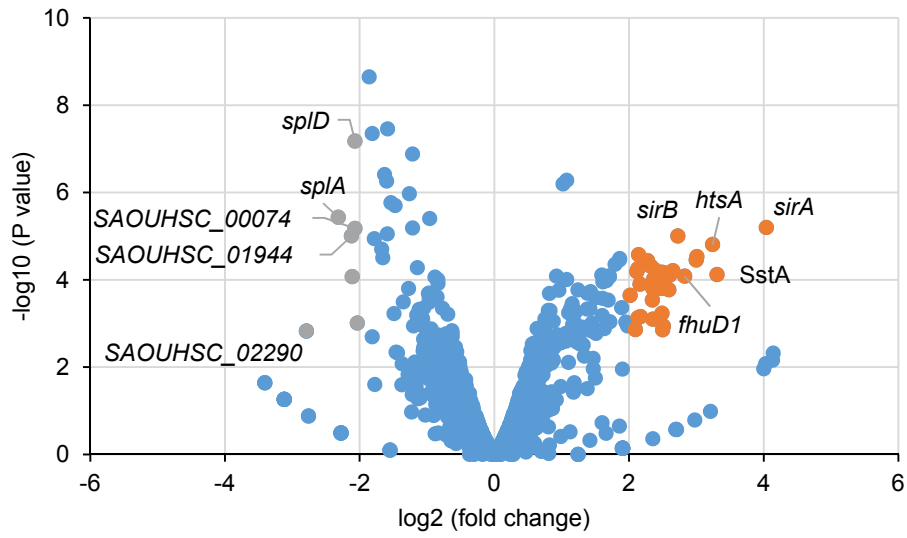

**Figure S3.** Volcano plot representation of the differentially expressed genes in RN6390 strain compared to the isogenic *essC* mutant. The orange and grey spots represent, respectively, genes that are up- or down-regulated in *essC* mutant relative to the parental strain. Note that the *essC* gene was removed from this analysis.

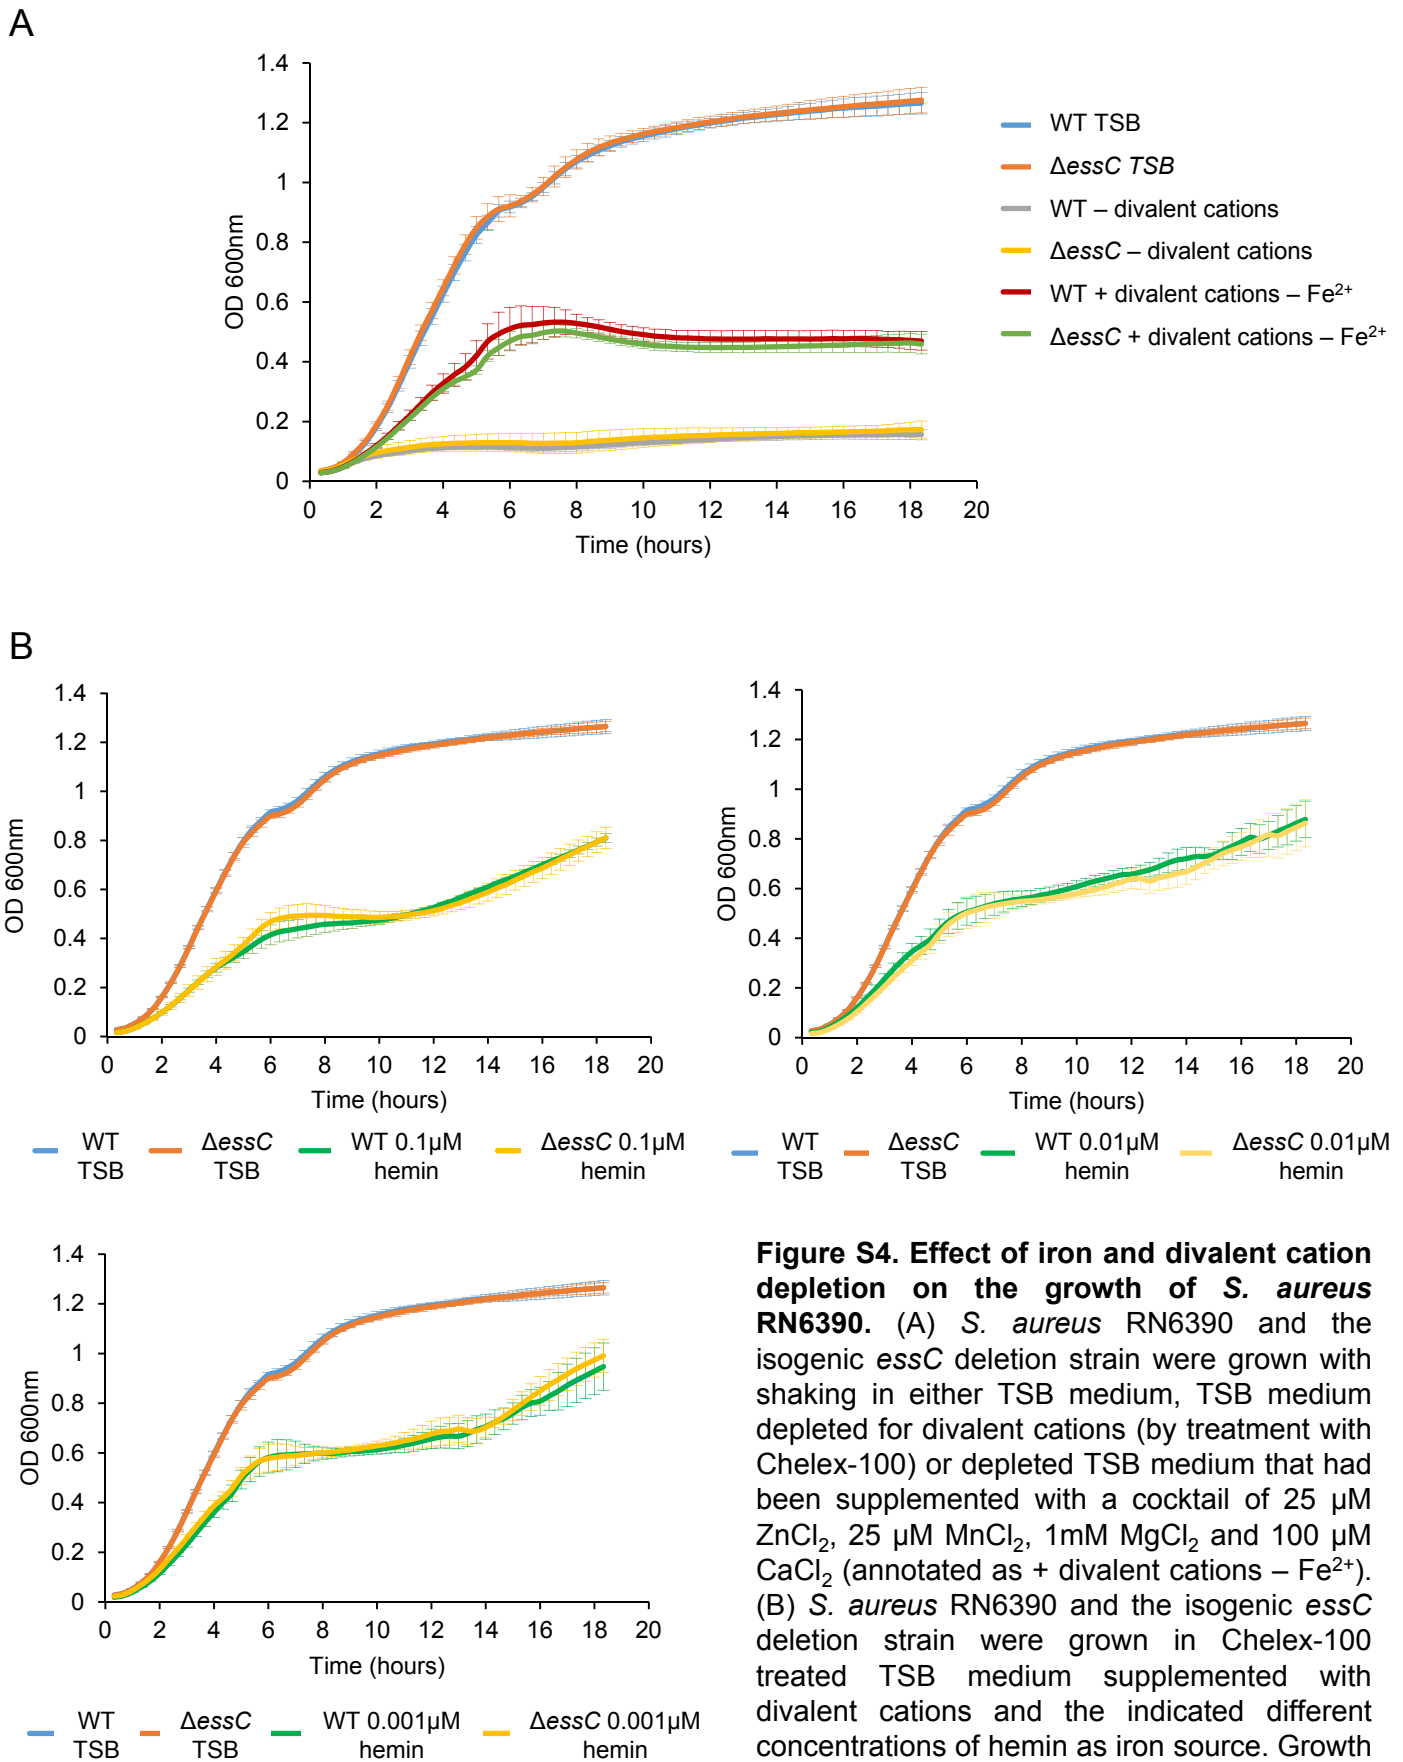

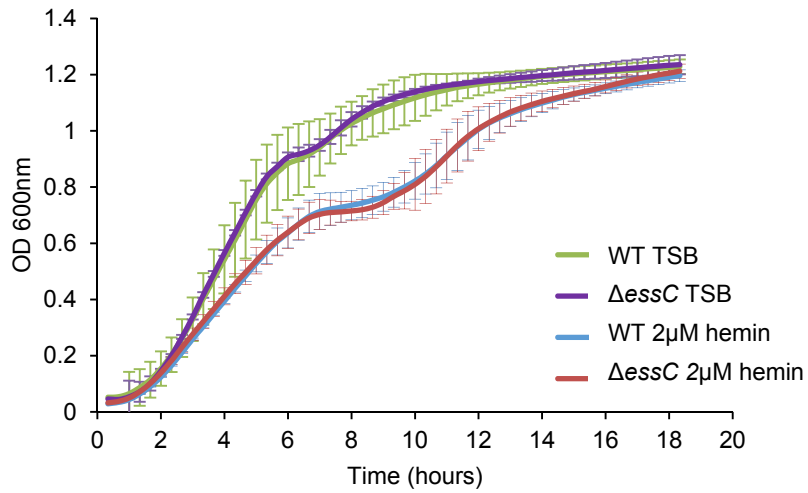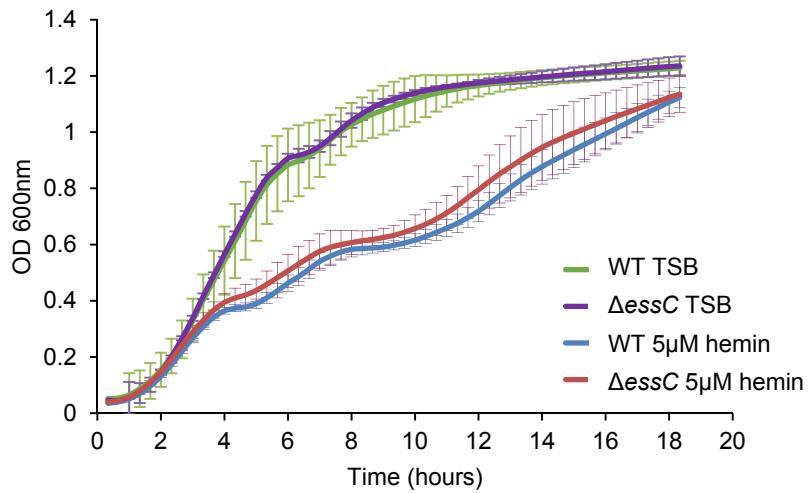

**Figure S5. Growth of *S. aureus* RN6390 and *essC* mutant strains with micromolar levels of hemin.** Strains RN6390 and the isogenic *essC* deletion were grown with shaking in TSB medium or TSB medium supplemented with 2  $\mu$ M or 5  $\mu$ M hemin, as indicated. Growth was monitored over 18 hours in 96-well plates (200  $\mu$ l volume). Error bars are  $\pm$  standard deviation,  $n=3$ .
